# Supplementary material for: Dimensional and Colorimetric Changes of Keratinized Tissue following Free Gingival Grafts Around Teeth: A Prospective Clinical Study
Source: Research Square preprint supplement (doi:10.21203/rs.3.rs-8089732/v1), 2025-12-02
Supplement: Supplementary file 1 [file 138f48c661cacf9e05334a99.docx]

| **Follow-up** | | **Mean diff.** | **SE** | **df** | **Bonferroni (*p* value)** | **Wald 95% CI** |
| --- | --- | --- | --- | --- | --- | --- |
| **Tim** | T6w |  |  | 1 |  |  |
| T3m |  |  | 1 |  |  |
| T6m |  |  | 1 |  |  |
| T12m |  |  | 1 |  |  |
| **T6w** | Tim |  |  |  |  |  |
| T3m |  |  |  |  |  |
| T6m |  |  |  |  |  |
| T12m |  |  |  |  |  |
| **T3m** | Tim |  |  |  |  |  |
| T6w |  |  |  |  |  |
| T6m |  |  |  |  |  |
| T12m |  |  |  |  |  |
| **T6m** | Tim |  |  |  |  |  |
| T6w |  |  |  |  |  |
| T3m |  |  |  |  |  |
| T12m |  |  |  |  |  |
| **T12m** | Tim |  |  |  |  |  |
| T6w |  |  |  |  |  |
| T3m |  |  |  |  |  |
| T6m |  |  |  |  |  |

**Supporting Information Table 1**. Pairwise comparisons across timepoints in KMW changes (mm).

**Supporting Information Table 2**. Pairwise comparisons across timepoints in graft volumetric changes (mm3).

| **Follow-up** | | **Mean diff.** | **SE** | **df** | **Bonferroni (p value)** | **Wald 95% CI** |
| --- | --- | --- | --- | --- | --- | --- |
| **Tim** | T6w | 48.22 | 6.82 | 1 | <0.001 | 34.86, 61.58 |
| T3m | 49.65 | 6.87 | 1 | <0.001 | 36.18, 63.12 |
| T6m | 49.29 | 6.73 | 1 | <0.001 | 36.11, 62.47 |
| T12m | 49.68 | 6.68 | 1 | <0.001 | 36.60, 62.76 |
| **T6w** | Tim |  |  |  |  |  |
| T3m |  |  |  |  |  |
| T6m |  |  |  |  |  |
| T12m |  |  |  |  |  |
| **T3m** | Tim |  |  |  |  |  |
| T6w |  |  |  |  |  |
| T6m |  |  |  |  |  |
| T12m |  |  |  |  |  |
| **T6m** | Tim |  |  |  |  |  |
| T6w |  |  |  |  |  |
| T3m |  |  |  |  |  |
| T12m |  |  |  |  |  |
| **T12m** | Tim |  |  |  |  |  |
| T6w |  |  |  |  |  |
| T3m |  |  |  |  |  |
| T6m |  |  |  |  |  |

**Supporting Information Table 3**. Pairwise comparisons across timepoints in graft height changes (mm).

**Supporting Information Table 4**. Pairwise comparisons across timepoints in graft width changes (mm).

| **Follow-up** | | **Mean diff.** | **SE** | **df** | **Bonferroni (p value)** | **Wald 95% CI** |
| --- | --- | --- | --- | --- | --- | --- |
| **Tim** | T6w |  |  | 1 |  |  |
| T3m |  |  | 1 |  |  |
| T6m |  |  | 1 |  |  |
| T12m |  |  | 1 |  |  |
| **T6w** | Tim |  |  |  |  |  |
| T3m |  |  |  |  |  |
| T6m |  |  |  |  |  |
| T12m |  |  |  |  |  |
| **T3m** | Tim |  |  |  |  |  |
| T6w |  |  |  |  |  |
| T6m |  |  |  |  |  |
| T12m |  |  |  |  |  |
| **T6m** | Tim |  |  |  |  |  |
| T6w |  |  |  |  |  |
| T3m |  |  |  |  |  |
| T12m |  |  |  |  |  |
| **T12m** | Tim |  |  |  |  |  |
| T6w |  |  |  |  |  |
| T3m |  |  |  |  |  |
| T6m |  |  |  |  |  |

| **Follow-up** | | **Mean diff.** | **SE** | **df** | **Bonferroni (*p* value)** | **Wald 95% CI** |
| --- | --- | --- | --- | --- | --- | --- |
| **Tim** | T6w |  |  | 1 |  |  |
| T3m |  |  | 1 |  |  |
| T6m |  |  | 1 |  |  |
| T12m |  |  | 1 |  |  |
| **T6w** | Tim |  |  |  |  |  |
| T3m |  |  |  |  |  |
| T6m |  |  |  |  |  |
| T12m |  |  |  |  |  |
| **T3m** | Tim |  |  |  |  |  |
| T6w |  |  |  |  |  |
| T6m |  |  |  |  |  |
| T12m |  |  |  |  |  |
| **T6m** | Tim |  |  |  |  |  |
| T6w |  |  |  |  |  |
| T3m |  |  |  |  |  |
| T12m |  |  |  |  |  |
| **T12m** | Tim |  |  |  |  |  |
| T6w |  |  |  |  |  |
| T3m |  |  |  |  |  |
| T6m |  |  |  |  |  |

**Supporting Information Table 5**. Pairwise comparisons across timepoints in graft surface changes (mm).

| **Follow-up** | | **Mean diff.** | **SE** | **df** | **Bonferroni (*p* value)** | **Wald 95% CI** |
| --- | --- | --- | --- | --- | --- | --- |
| **Tim** | T6w |  |  | 1 |  |  |
| T3m |  |  | 1 |  |  |
| T6m |  |  | 1 |  |  |
| T12m |  |  | 1 |  |  |
| **T6w** | Tim |  |  |  |  |  |
| T3m |  |  |  |  |  |
| T6m |  |  |  |  |  |
| T12m |  |  |  |  |  |
| **T3m** | Tim |  |  |  |  |  |
| T6w |  |  |  |  |  |
| T6m |  |  |  |  |  |
| T12m |  |  |  |  |  |
| **T6m** | Tim |  |  |  |  |  |
| T6w |  |  |  |  |  |
| T3m |  |  |  |  |  |
| T12m |  |  |  |  |  |
| **T12m** | Tim |  |  |  |  |  |
| T6w |  |  |  |  |  |
| T3m |  |  |  |  |  |
| T6m |  |  |  |  |  |

**Supporting Information Table 6**. Association between graft surface changes (mm2) from Tim toT12m and patient- or clinical- related variables. Results from simple and multiple linear regression models using generalized estimating equations (GEE).

|  | **Simple linear analysis** | | **Multiple linear analysis** | |
| --- | --- | --- | --- | --- |
| **Variable** | **β (95% CI)** | ***P* value** | **β (95% CI)** | ***P* value** |
| **Gender** |  |  |  |  |
| Male | 0 |  |  |  |
| Female | 11.9 (-3.97, 27.7) | 0.142 |  |  |
| **Tooth type** |  |  |  |  |
| Incisors/ Canines | 0 |  |  |  |
| Premolars | -9.88 (-25.2, 5.42) | 0.206 |  |  |
| **Recession type** |  |  |  |  |
| RT1 | 0 | **<0.001**** |  |  |
| RT2 | 10.5 (0.19, 20.8) | **0.046*** |  |  |
| RT3 | -9.84 (-24.4, 4.71) | 0.185 |  |  |
| **Graft volume (mm3) at Tim** | -0.19 (-0.36, -0.02) | **0.026*** |  |  |
| **Graft height (mm) at Tim** | -8.84 (-14.9, -2.77) | **0.004*** | -4.32 (-8.81, 0.18) | 0.060 |
| **Graft width (mm) at Tim** | -2.46 (-4.27, -0.65) | **0.008*** |  |  |
| **Graft height over root (mm) at Tim** | 1.44 (-8.15, 11.9) | 0.769 |  |  |
| **Graft thickness 1.5 mm (mm) at Tim** | 22.4 (-8.31, 53.1) | 0.153 |  |  |
| **Graft thickness 3 mm (mm) at Tim** | -5.80 (-23.5, 11.9) | 0.520 |  |  |
| **Graft surface over recipient bed (%) at T1** | -0.17 (-1.46, 1.12) | 0.796 |  |  |
| **REC (mm) at T0** | -3.53 (-7.37, 0.30) | 0.071 |  |  |
| **REC surface (mm2) at T0** | -1.26 (-1.74, -0.78) | **<0.001**** | -0.94 (-1.32, -0.56) | **<0.001**** |
| **PPD (mm) at T0** | -3.51 (-15.8, 8.80) | 0.577 |  |  |
| **KTW (mm) at T0** | -20.6 (-37.8, -3.34) | **0.019*** | -15.1 (-26.2, -4.07) | **0.007*** |
| **CAL (mm) at T0** | -4.24 (-8.44, -0.05) | **0.048*** |  |  |

*p<0.05; ** *p*<0.001

RT: Recession Type; REC: Recession; PPD: Probing Pocket Depth; KTW: Keratinized Tissue Width; CAL: clinical attachment level.

**Supporting Information Table 7**. Pairwise comparisons across timepoints in mean graft height over root surface changes (mm).

| **Follow-up** | | **Mean diff.** | **SE** | **df** | **Bonferroni (*p* value)** | **Wald 95% CI** |
| --- | --- | --- | --- | --- | --- | --- |
| **Tim** | T6w |  |  | 1 |  |  |
| T3m |  |  | 1 |  |  |
| T6m |  |  | 1 |  |  |
| T12m |  |  | 1 |  |  |
| **T6w** | Tim |  |  |  |  |  |
| T3m |  |  |  |  |  |
| T6m |  |  |  |  |  |
| T12m |  |  |  |  |  |
| **T3m** | Tim |  |  |  |  |  |
| T6w |  |  |  |  |  |
| T6m |  |  |  |  |  |
| T12m |  |  |  |  |  |
| **T6m** | Tim |  |  |  |  |  |
| T6w |  |  |  |  |  |
| T3m |  |  |  |  |  |
| T12m |  |  |  |  |  |
| **T12m** | Tim |  |  |  |  |  |
| T6w |  |  |  |  |  |
| T3m |  |  |  |  |  |
| T6m |  |  |  |  |  |

**Supporting Information Table 8**. Pairwise comparisons across timepoints in mean graft thickness changes (mm) at 1.5 mm.

| **Follow-up** | | **Mean diff.** | **SE** | **df** | **Bonferroni (*p* value)** | **Wald 95% CI** |
| --- | --- | --- | --- | --- | --- | --- |
| **Tim** | T6w |  |  | 1 |  |  |
| T3m |  |  | 1 |  |  |
| T6m |  |  | 1 |  |  |
| T12m |  |  | 1 |  |  |
| **T6w** | Tim |  |  |  |  |  |
| T3m |  |  |  |  |  |
| T6m |  |  |  |  |  |
| T12m |  |  |  |  |  |
| **T3m** | Tim |  |  |  |  |  |
| T6w |  |  |  |  |  |
| T6m |  |  |  |  |  |
| T12m |  |  |  |  |  |
| **T6m** | Tim |  |  |  |  |  |
| T6w |  |  |  |  |  |
| T3m |  |  |  |  |  |
| T12m |  |  |  |  |  |
| **T12m** | Tim |  |  |  |  |  |
| T6w |  |  |  |  |  |
| T3m |  |  |  |  |  |
| T6m |  |  |  |  |  |

**Supporting Information Table 9**. Pairwise comparisons across timepoints in mean graft thickness changes (mm) at 3 mm.

| **Follow-up** | | **Mean diff.** | **SE** | **df** | **Bonferroni (*p* value)** | **Wald 95% CI** |
| --- | --- | --- | --- | --- | --- | --- |
| **Tim** | T6w |  |  | 1 |  |  |
| T3m |  |  | 1 |  |  |
| T6m |  |  | 1 |  |  |
| T12m |  |  | 1 |  |  |
| **T6w** | Tim |  |  |  |  |  |
| T3m |  |  |  |  |  |
| T6m |  |  |  |  |  |
| T12m |  |  |  |  |  |
| **T3m** | Tim |  |  |  |  |  |
| T6w |  |  |  |  |  |
| T6m |  |  |  |  |  |
| T12m |  |  |  |  |  |
| **T6m** | Tim |  |  |  |  |  |
| T6w |  |  |  |  |  |
| T3m |  |  |  |  |  |
| T12m |  |  |  |  |  |
| **T12m** | Tim |  |  |  |  |  |
| T6w |  |  |  |  |  |
| T3m |  |  |  |  |  |
| T6m |  |  |  |  |  |

**Supporting Information Table 10**. Pairwise comparisons across timepoints in REC height changes (mm).

| **Follow-up** | | **Mean diff.** | **SE** | **df** | **Bonferroni (*p* value)** | **Wald 95% CI** |
| --- | --- | --- | --- | --- | --- | --- |
| **Tim** | T6w |  |  | 1 |  |  |
| T3m |  |  | 1 |  |  |
| T6m |  |  | 1 |  |  |
| T12m |  |  | 1 |  |  |
| **T6w** | Tim |  |  |  |  |  |
| T3m |  |  |  |  |  |
| T6m |  |  |  |  |  |
| T12m |  |  |  |  |  |
| **T3m** | Tim |  |  |  |  |  |
| T6w |  |  |  |  |  |
| T6m |  |  |  |  |  |
| T12m |  |  |  |  |  |
| **T6m** | Tim |  |  |  |  |  |
| T6w |  |  |  |  |  |
| T3m |  |  |  |  |  |
| T12m |  |  |  |  |  |
| **T12m** | Tim |  |  |  |  |  |
| T6w |  |  |  |  |  |
| T3m |  |  |  |  |  |
| T6m |  |  |  |  |  |

| **Follow-up** | | **Mean diff.** | **SE** | **df** | **Bonferroni (*p* value)** | **Wald 95% CI** |
| --- | --- | --- | --- | --- | --- | --- |
| **Tim** | T6w |  |  | 1 |  |  |
| T3m |  |  | 1 |  |  |
| T6m |  |  | 1 |  |  |
| T12m |  |  | 1 |  |  |
| **T6w** | Tim |  |  |  |  |  |
| T3m |  |  |  |  |  |
| T6m |  |  |  |  |  |
| T12m |  |  |  |  |  |
| **T3m** | Tim |  |  |  |  |  |
| T6w |  |  |  |  |  |
| T6m |  |  |  |  |  |
| T12m |  |  |  |  |  |
| **T6m** | Tim |  |  |  |  |  |
| T6w |  |  |  |  |  |
| T3m |  |  |  |  |  |
| T12m |  |  |  |  |  |
| **T12m** | Tim |  |  |  |  |  |
| T6w |  |  |  |  |  |
| T3m |  |  |  |  |  |
| T6m |  |  |  |  |  |

**Supporting Information Table 11**. Pairwise comparisons across timepoints in REC surface changes (mm).

**Supporting information Table 12**. Pairwise comparisons across timepoints in PPD changes.

| **Follow-up** | **T0** | **T6w** | **T3m** | **T6m** | **T12m** |
| --- | --- | --- | --- | --- | --- |
| **T0** |  |  |  |  |  |
| **T6w** | 1 |  |  |  |  |
| **T3m** | 1 | 1 |  |  |  |
| **T6m** | 1 | 0.960 | 0.210 |  |  |
| **T12m** | 1 | 1 | 0.350 | 1 |  |

**Supporting Information Table 13**. Pairwise comparisons across timepoints in CAL changes.

| **Follow-up** | **T0** | **T6w** | **T3m** | **T6m** | **T12m** |
| --- | --- | --- | --- | --- | --- |
| **T0** |  |  |  |  |  |
| **T6w** | 0.180 |  |  |  |  |
| **T3m** | 0.010* | 0.142 |  |  |  |
| **T6m** | 0.460 | 1 | 0.043* |  |  |
| **T12m** | 0.181 | 1 | 0.065 | 1 |  |
